# Supplementary material for: Measurement report: Rapid decline of aerosol absorption coefficient and aerosol optical property effects on radiative forcing in an urban area of Beijing from 2018 to 2021
Source: Copernicus journal article supplement (doi:10.5194/acp-23-5517-2023), 2023-05-17
Supplement: Supplementary file [file acp-23-5517-2023-supplement.pdf]

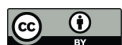

*Supplement of*

**Measurement report: Rapid decline of aerosol absorption coefficient and aerosol optical property effects on radiative forcing in an urban area of Beijing from 2018 to 2021**

**Xinyao Hu et al.**

*Correspondence to:* Junying Sun ([jysun@cma.gov.cn](mailto:jysun@cma.gov.cn))

The copyright of individual parts of the supplement might differ from the article licence.

**Table S1.** Mann–Kendall trend test results ( $p = 0.05$ ) for monthly mean value of  $\sigma_{ab}$  for  $PM_1$  and  $PM_{10}$  from 2018 to 2021. Z is the standardized test statistic value.

|                       | Trend            | Z       | sen's slope |
|-----------------------|------------------|---------|-------------|
| $PM_1 \sigma_{ab}$    | Decreasing trend | -5.8134 | -0.24856    |
| $PM_{10} \sigma_{ab}$ | Decreasing trend | -5.643  | -0.29905    |

**Table S2.** Pearson correlation coefficient (R) between different aerosol optical properties and meteorological parameters (\* Significant at  $p < 0.05$ ).

|                       | pressure | temperature | RH    | precipitation | wind speed |
|-----------------------|----------|-------------|-------|---------------|------------|
| $PM_1 \sigma_{ab}$    | -0.10*   | -0.05*      | 0.30* | -0.03*        | -0.31*     |
| $PM_{10} \sigma_{ab}$ | -0.10*   | -0.05*      | 0.30* | -0.03*        | -0.30*     |

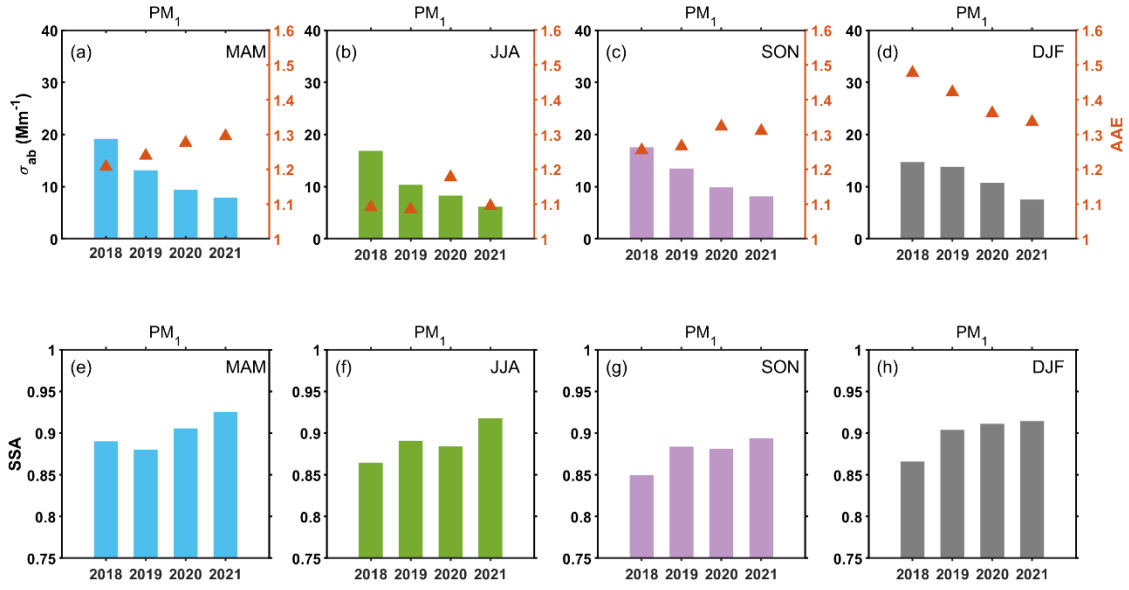

**Figure S1.** (a-d) Seasonal mean  $\sigma_{ab}$  (bar) for PM<sub>1</sub> at 550 nm, seasonal mean AAE<sub>450/700</sub> (triangle) for PM<sub>1</sub>, and (e-f) seasonal mean SSA (bar) for PM<sub>1</sub> at 550 nm from 2018-2021.

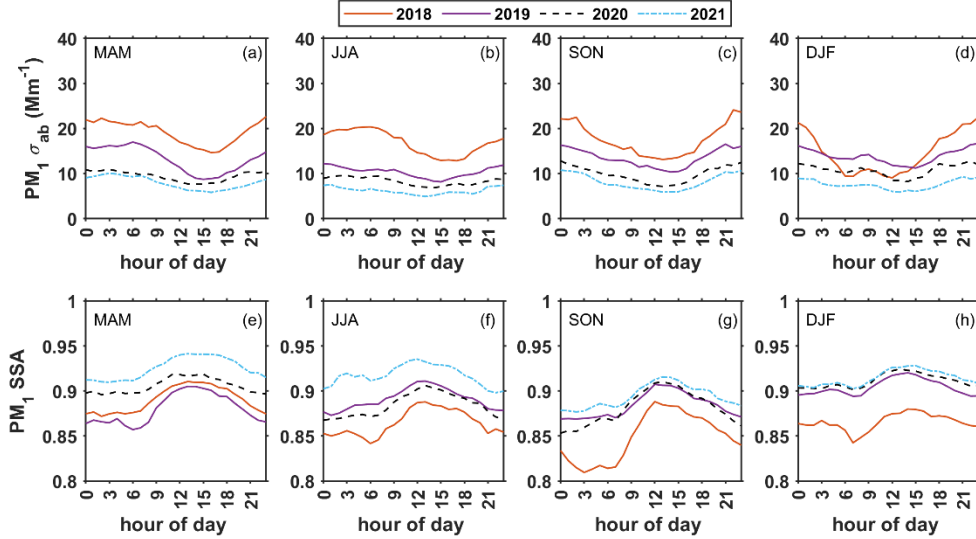

**Figure S2.** Diurnal variations of  $\sigma_{ab}$  (a-d) and SSA (e-h) at 550 nm for PM<sub>1</sub> from 2018 to 2021.

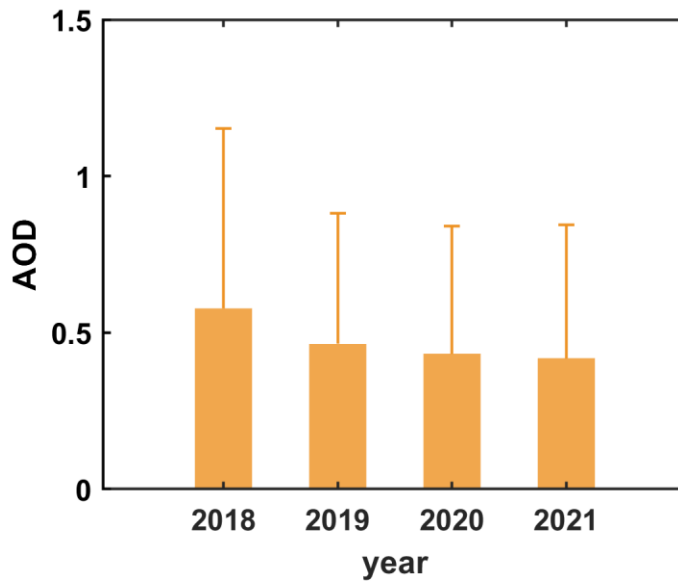

**Figure S3.** The annual variation of AOD from 2018 to 2021. Errorbar represents the standard deviation. (Available from the Aerosol Robotic Network)

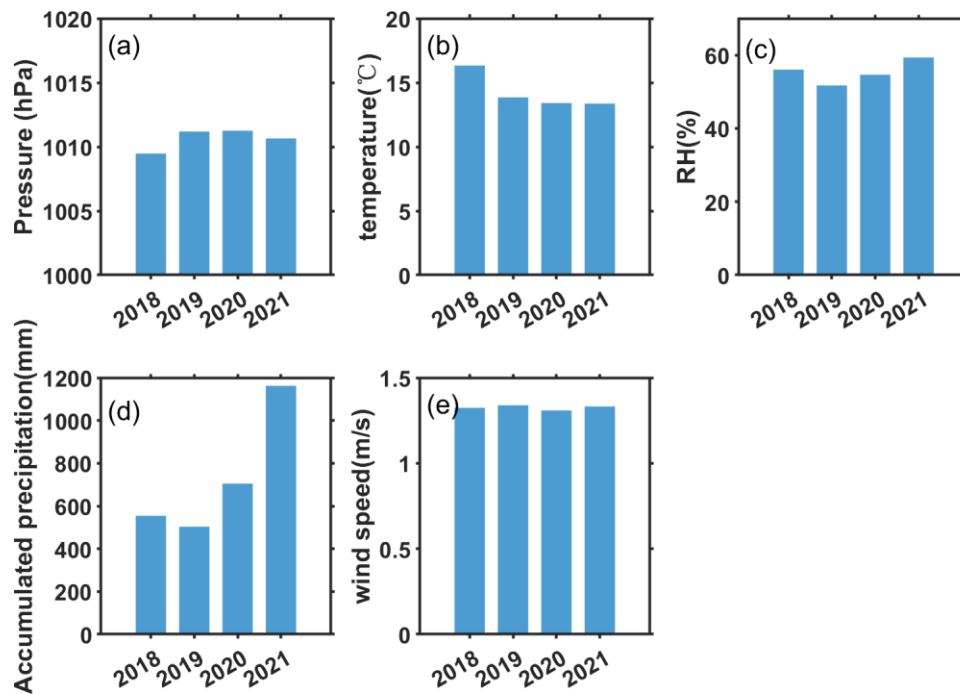

**Figure S4.** The annual variation of meteorological parameters from 2018 to 2021.
